# Supplementary material for: Video-based messages to reduce COVID-19 vaccine hesitancy and nudge vaccination intentions
Source: PLOS journal article supplement (doi:10.1371/journal.pone.0265736), 2022-04-06
Supplement: S16 (10.1371/journal.pone.0265736.s016) [file journal.pone.0265736.s016]

**S10 Table. Heterogenous treatment effect on vaccination intentions by political ideology**

|                                              |                    |
|----------------------------------------------|--------------------|
| Experimental Group ( <i>Ref. = Placebo</i> ) |                    |
| Treatments (Pooled)                          | 0.27<br>(0.63)     |
| Political Ideology (PI)                      | -0.56**<br>(-2.31) |
| Treatments * PI                              | 0.23<br>(0.77)     |
| Vaccination Intention (T1)                   | 0.71***<br>(17.54) |
| Man ( <i>Ref. = Woman</i> )                  | 0.18<br>(0.66)     |
| Age                                          | 0.00<br>(0.36)     |
| Education ( <i>Ref. = High School</i> )      |                    |
| College Degree                               | 0.67**<br>(2.35)   |
| Professional Degree                          | 0.10<br>(0.27)     |
| Doctorate                                    | 0.38<br>(0.32)     |
| Race/Ethnicity ( <i>Ref. = Non-White</i> )   | 0.22<br>(0.79)     |
| Rural ( <i>Ref. = Urban</i> )                | 0.05<br>(0.15)     |
| Constant                                     | 1.11<br>(1.56)     |
| Observations                                 | 447                |
| R-squared                                    | 0.65               |

Notes: \*\*\* p<0.01, \*\* p<0.05, \* p<0.1. Robust t-statistics in parentheses with k-1 state dummies. LATE estimated using OLS regressions, showing unstandardized regression coefficient estimates. Two-sided tests. PI is treated as continuous with three categories: 1 “liberal”, 2 “moderate”, and 3 “conservative”.
